# Supplementary material for: Electrically responsive structural transformations triggered by vapour and temperature in a series of pleochroic bis(oxalato)chromium(iii) complex salts
Source: Royal Society of Chemistry journal article supplement (doi:10.1039/d2tc01103d), 2022-01-01
Supplement: d2tc01103d1.pdf [file d2tc01103d1.pdf]

## **Electronic supplementary information**

**for**

### **Electrically responsive structural transformations triggered by vapour and temperature in a series of pleochroic bis(oxalato)chromium(III) complex salts**

**Marko Dunatov,<sup>a</sup> Andreas Puškarić,<sup>a</sup> Luka Pavić,<sup>a</sup> Zoran Štefanić<sup>a</sup> and Lidija Androš Dubraja\*<sup>a</sup>**

<sup>1</sup>Ruđer Bošković Institute, Bijenička cesta 54, 10000 Zagreb, Croatia

## Contents

|                                                                                                                                                                                                                                                                                                                                                               |    |
|---------------------------------------------------------------------------------------------------------------------------------------------------------------------------------------------------------------------------------------------------------------------------------------------------------------------------------------------------------------|----|
| <b>Table S1.</b> Crystallographic data and structure refinement details for compound <b>1</b> <sub>H<sub>2</sub>O</sub> , <b>2</b> <sub>H<sub>2</sub>O</sub> , <b>3</b> <sub>MeOH</sub> , <b>3</b> , <b>4</b> <sub>H<sub>2</sub>O</sub> , <b>4</b> , <b>5</b> <sub>H<sub>2</sub>O</sub> , and <b>6</b> <sub>H<sub>2</sub>O</sub> .....                        | 3  |
| <b>Table S2.</b> Crystallographic data and structure refinement details for compound <b>1</b> and <b>3</b> <sub>H<sub>2</sub>O</sub> .....                                                                                                                                                                                                                    | 4  |
| <b>Figure S1.</b> Room temperature XRPD pattern and profile fitting results for <b>1</b> .....                                                                                                                                                                                                                                                                | 5  |
| <b>Figure S2.</b> Room temperature XRPD pattern and profile fitting results for <b>3</b> <sub>H<sub>2</sub>O</sub> .....                                                                                                                                                                                                                                      | 5  |
| <b>Figure S3.</b> XRPD patterns of <b>1</b> , <b>1</b> <sub>H<sub>2</sub>O</sub> and corresponding calculated patterns from single-crystal X-ray diffraction data .....                                                                                                                                                                                       | 6  |
| <b>Figure S4.</b> XRPD patterns of <b>2</b> and <b>2</b> <sub>H<sub>2</sub>O</sub> .....                                                                                                                                                                                                                                                                      | 6  |
| <b>Figure S5.</b> XRPD patterns of <b>3</b> , <b>3</b> <sub>H<sub>2</sub>O</sub> , <b>3</b> <sub>MeOH</sub> and corresponding calculated patterns from single-crystal X-ray diffraction data.....                                                                                                                                                             | 7  |
| <b>Figure S6.</b> XRPD patterns of <b>4</b> <sub>H<sub>2</sub>O</sub> at 293 and 363 K, and <b>4</b> at 378 and 383 K.....                                                                                                                                                                                                                                    | 7  |
| <b>Figure S7.</b> Pleochroism in complex salts <b>1</b> <sub>H<sub>2</sub>O</sub> (a), <b>3</b> <sub>MeOH</sub> (b), <b>5</b> <sub>H<sub>2</sub>O</sub> (c) and <b>6</b> <sub>H<sub>2</sub>O</sub> (d) .....                                                                                                                                                  | 8  |
| <b>Figure S8.</b> ATR spectra of <b>1</b> and <b>1</b> <sub>H<sub>2</sub>O</sub> .....                                                                                                                                                                                                                                                                        | 9  |
| <b>Figure S9.</b> ATR spectra of <b>2</b> and <b>2</b> <sub>H<sub>2</sub>O</sub> .....                                                                                                                                                                                                                                                                        | 9  |
| <b>Figure S10.</b> ATR spectra of <b>3</b> , <b>3</b> <sub>MeOH</sub> and <b>3</b> <sub>H<sub>2</sub>O</sub> .....                                                                                                                                                                                                                                            | 9  |
| <b>Figure S11.</b> ATR spectrum of <b>4</b> <sub>H<sub>2</sub>O</sub> .....                                                                                                                                                                                                                                                                                   | 10 |
| <b>Figure S12.</b> ATR spectrum of <b>5</b> <sub>H<sub>2</sub>O</sub> .....                                                                                                                                                                                                                                                                                   | 10 |
| <b>Figure S13.</b> ATR spectrum of <b>6</b> <sub>H<sub>2</sub>O</sub> .....                                                                                                                                                                                                                                                                                   | 10 |
| <b>Figure S14.</b> <i>In situ</i> ATR spectra following the drying and wetting proces of compound <b>1</b> at 298 K and atmosperic pressure .....                                                                                                                                                                                                             | 11 |
| <b>Figure S15.</b> <i>In situ</i> ATR spectra following the drying and recovery (exposure to MeOH vapour) process of compound <b>3</b> <sub>MeOH</sub> at 25 °C and atmosperic pressure (a). <i>In situ</i> ATR spectra following the wetting and drying process of compound <b>3</b> <sub>H<sub>2</sub>O</sub> at at 298 K and atmosperic pressure (b) ..... | 11 |
| <b>Figure S16.</b> TGA and DTA curves for compounds: <b>1</b> and <b>2</b> (a), <b>3</b> <sub>H<sub>2</sub>O</sub> (b) and <b>4</b> <sub>H<sub>2</sub>O</sub> – <b>6</b> <sub>H<sub>2</sub>O</sub> (c) measured under a synthetic air atmosphere .....                                                                                                        | 12 |
| <b>Figure S17.</b> Temperature dependence of the dielectric loss during heating (dark red symbols) and cooling (blue symbols) cycles measured at 100 kHz frequency for compounds <b>1</b> , <b>3</b> <sub>MeOH</sub> , <b>4</b> <sub>H<sub>2</sub>O</sub> , <b>5</b> <sub>H<sub>2</sub>O</sub> , and <b>6</b> <sub>H<sub>2</sub>O</sub> .....                 | 13 |
| <b>Figure S18.</b> Temperature dependence of the dielectric constant during heating (dark red symbols) and cooling (blue symbols) cycles measured at 10 kHz frequency for compounds <b>3</b> <sub>MeOH</sub> , <b>4</b> <sub>H<sub>2</sub>O</sub> , <b>5</b> <sub>H<sub>2</sub>O</sub> , and <b>6</b> <sub>H<sub>2</sub>O</sub> .....                         | 13 |
| <b>Figure S19.</b> Temperature dependence of the dielectric loss during heating (dark red symbols) and cooling (blue symbols) cycles measured at 10 kHz frequency for compounds <b>3</b> <sub>MeOH</sub> , <b>4</b> <sub>H<sub>2</sub>O</sub> , <b>5</b> <sub>H<sub>2</sub>O</sub> , and <b>6</b> <sub>H<sub>2</sub>O</sub> .....                             | 14 |
| <b>Figure S20.</b> Frequency dependence of the dielectric constant for compounds <b>1</b> , <b>3</b> <sub>MeOH</sub> , <b>4</b> <sub>H<sub>2</sub>O</sub> , <b>5</b> <sub>H<sub>2</sub>O</sub> , and <b>6</b> <sub>H<sub>2</sub>O</sub> at 298 K .....                                                                                                        | 14 |

**Table S1.** Crystallographic data and structure refinement details for compound **1<sub>H2O</sub>**, **2<sub>H2O</sub>**, **3<sub>MeOH</sub>**, **3**, **4<sub>H2O</sub>**, **4**, **5<sub>H2O</sub>**, and **6<sub>H2O</sub>**

| Compound                                                                 | <b>1<sub>H2O</sub></b>                                                         | <b>2<sub>H2O</sub></b>                                                         | <b>3<sub>MeOH</sub></b>                                                       | <b>3</b>                                                                      | <b>4<sub>H2O</sub></b>                                           | <b>4</b>                                                        | <b>5<sub>H2O</sub></b>                                           | <b>6<sub>H2O</sub></b>                                           |
|--------------------------------------------------------------------------|--------------------------------------------------------------------------------|--------------------------------------------------------------------------------|-------------------------------------------------------------------------------|-------------------------------------------------------------------------------|------------------------------------------------------------------|-----------------------------------------------------------------|------------------------------------------------------------------|------------------------------------------------------------------|
| Temperature/K                                                            | 140                                                                            | 293                                                                            | 223                                                                           | 298                                                                           | 298                                                              | 400                                                             | 298                                                              | 298                                                              |
| Crystal colour, habit                                                    | orange and purplish red, stick                                                 | orange and purplish red, prism                                                 | orange and purplish red, prism                                                | red, prism                                                                    | red, prism                                                       | red, prism                                                      | orange and purplish red, prism                                   | orange and purplish red, prism                                   |
| Empirical formula                                                        | C <sub>34</sub> H <sub>54</sub> Cr <sub>2</sub> N <sub>6</sub> O <sub>28</sub> | C <sub>38</sub> H <sub>48</sub> Cr <sub>2</sub> N <sub>6</sub> O <sub>25</sub> | C <sub>22</sub> H <sub>27</sub> Cr <sub>1</sub> N <sub>4</sub> O <sub>9</sub> | C <sub>21</sub> H <sub>23</sub> Cr <sub>1</sub> N <sub>4</sub> O <sub>8</sub> | C <sub>21</sub> H <sub>22</sub> CrN <sub>3</sub> O <sub>10</sub> | C <sub>21</sub> H <sub>20</sub> CrN <sub>3</sub> O <sub>9</sub> | C <sub>22</sub> H <sub>26</sub> CrN <sub>3</sub> O <sub>13</sub> | C <sub>23</sub> H <sub>26</sub> CrN <sub>3</sub> O <sub>12</sub> |
| <i>M<sub>r</sub></i> /g mol <sup>-1</sup>                                | 1098.80                                                                        | 1092.81                                                                        | 543.47                                                                        | 511.43                                                                        | 528.41                                                           | 510.40                                                          | 592.46                                                           | 588.47                                                           |
| Crystal system                                                           | Triclinic                                                                      | Triclinic                                                                      | Monoclinic                                                                    | Triclinic                                                                     | Monoclinic                                                       | Monoclinic                                                      | Orthorhombic                                                     | Monoclinic                                                       |
| Space group                                                              | <i>P</i> $\bar{1}$                                                             | <i>P</i> $\bar{1}$                                                             | <i>P</i> 2 <sub>1</sub> / <i>c</i>                                            | <i>P</i> $\bar{1}$                                                            | <i>P</i> 2 <sub>1</sub> / <i>c</i>                               | <i>P</i> 2 <sub>1</sub> / <i>c</i>                              | <i>Pbca</i>                                                      | <i>P</i> 2 <sub>1</sub> / <i>c</i>                               |
| <i>a</i> /Å                                                              | 12.2426(5)                                                                     | 10.4903(2)                                                                     | 15.8377(2)                                                                    | 9.5955(4)                                                                     | 15.4312(4)                                                       | 15.875(2)                                                       | 12.5654(1)                                                       | 15.8032(1)                                                       |
| <i>b</i> /Å                                                              | 13.2490(6)                                                                     | 13.9080(2)                                                                     | 14.9630(2)                                                                    | 9.7701(5)                                                                     | 11.8305(3)                                                       | 10.325(2)                                                       | 19.0980(1)                                                       | 10.4129(1)                                                       |
| <i>c</i> /Å                                                              | 15.9614(7)                                                                     | 17.7129(4)                                                                     | 9.9377(1)                                                                     | 12.4681(7)                                                                    | 13.3558(4)                                                       | 14.072(2)                                                       | 20.5684(1)                                                       | 14.8291(1)                                                       |
| $\alpha$ /°                                                              | 99.315(5)                                                                      | 97.152(2)                                                                      | 90                                                                            | 91.438(4)                                                                     | 90                                                               | 90                                                              | 90                                                               | 90                                                               |
| $\beta$ /°                                                               | 100.091(5)                                                                     | 100.620(2)                                                                     | 93.667(1)                                                                     | 100.633(4)                                                                    | 110.515(3)                                                       | 112.22(2)                                                       | 90                                                               | 93.612(1)                                                        |
| $\gamma$ /°                                                              | 107.873(4)                                                                     | 92.735(2)                                                                      | 90                                                                            | 107.230(4)                                                                    | 90                                                               | 90                                                              | 90                                                               | 90                                                               |
| <i>V</i> /Å <sup>3</sup>                                                 | 2360.80(19)                                                                    | 2513.64(8)                                                                     | 2350.21(5)                                                                    | 1093.28(10)                                                                   | 2283.59(12)                                                      | 2135.3(6)                                                       | 4935.88(5)                                                       | 2435.39(3)                                                       |
| <i>Z</i>                                                                 | 2                                                                              | 2                                                                              | 4                                                                             | 2                                                                             | 4                                                                | 4                                                               | 8                                                                | 4                                                                |
| $\rho_{\text{calcd}}$ /g cm <sup>-3</sup>                                | 1.546                                                                          | 1.432                                                                          | 1.536                                                                         | 1.554                                                                         | 1.537                                                            | 1.588                                                           | 1.595                                                            | 1.605                                                            |
| $\mu$ /mm <sup>-1</sup>                                                  | 4.680                                                                          | 4.351                                                                          | 4.548                                                                         | 4.816                                                                         | 4.688                                                            | 4.956                                                           | 4.500                                                            | 4.525                                                            |
| <i>F</i> (000)                                                           | 1144                                                                           | 1096                                                                           | 1132                                                                          | 530                                                                           | 1092                                                             |                                                                 | 2456                                                             | 1220                                                             |
| $\theta$ range/°                                                         | 3.60–80.61                                                                     | 3.21–76.47                                                                     | 5.35–77.16                                                                    | 3.62–74.86                                                                    | 3.05–75.87                                                       | 5.23–78.66                                                      | 4.73–75.88                                                       | 5.09–75.84                                                       |
| Measured reflections                                                     | 38971                                                                          | 26104                                                                          | 15683                                                                         | 7468                                                                          | 12391                                                            | 9496                                                            | 28808                                                            | 13372                                                            |
| Independent reflections                                                  | 10043                                                                          | 10392                                                                          | 4799                                                                          | 4281                                                                          | 4716                                                             | 3778                                                            | 5119                                                             | 5020                                                             |
| Observed reflections                                                     | 9364                                                                           | 9692                                                                           | 4570                                                                          | 3673                                                                          | 4160                                                             | 2477                                                            | 4872                                                             | 4683                                                             |
| No. of parameters, restraints                                            | 710, 36                                                                        | 721, 2                                                                         | 355, 4                                                                        | 307, 0                                                                        | 332, 3                                                           | 333, 6                                                          | 364, 2                                                           | 384, 8                                                           |
| <i>R</i> <sub>int</sub>                                                  | 0.0431                                                                         | 0.0272                                                                         | 0.0312                                                                        | 0.0597                                                                        | 0.0536                                                           | 0.1069                                                          | 0.0277                                                           | 0.0338                                                           |
| <i>R</i> , <i>wR</i> [ <i>I</i> > 2 $\sigma$ ( <i>I</i> )]               | 0.0508, 0.1347                                                                 | 0.0577, 0.1737                                                                 | 0.0333, 0.0935                                                                | 0.0573, 0.1616                                                                | 0.0600, 0.1620                                                   | 0.1564, 0.3248                                                  | 0.0451, 0.1400                                                   | 0.0406, 0.1026                                                   |
| <i>R</i> , <i>wR</i> [all data]                                          | 0.0537, 0.1366                                                                 | 0.0601, 0.1786                                                                 | 0.0347, 0.0946                                                                | 0.0717, 0.1764                                                                | 0.0650, 0.1729                                                   | 0.2094, 0.3585                                                  | 0.0465, 0.1419                                                   | 0.0433, 0.1050                                                   |
| Goodness of fit                                                          | 1.049                                                                          | 1.042                                                                          | 1.085                                                                         | 0.991                                                                         | 1.028                                                            | 1.159                                                           | 1.052                                                            | 1.070                                                            |
| $\Delta\rho_{\text{max}}$ , $\Delta\rho_{\text{min}}$ /e Å <sup>-3</sup> | 0.676, -0.712                                                                  | 1.062; -0.410                                                                  | 0.295; -0.577                                                                 | 0.661; -0.636                                                                 | 0.763; -0.534                                                    | 0.412; -0.769                                                   | 0.544; -0.739                                                    | 0.311; -0.570                                                    |

**Table S2.** Crystallographic data and structure refinement details for compound **1** and **3H<sub>2</sub>O**

| <b>Compound</b>                               | <b>1</b>                                                                       | <b>3H<sub>2</sub>O</b>                                           |
|-----------------------------------------------|--------------------------------------------------------------------------------|------------------------------------------------------------------|
| Temperature/K                                 | 293                                                                            | 293                                                              |
| Crystal colour, habit                         | reddish, stick                                                                 | reddish, prism                                                   |
| Empirical formula                             | C <sub>34</sub> H <sub>30</sub> Cr <sub>2</sub> N <sub>6</sub> O <sub>16</sub> | C <sub>21</sub> H <sub>33</sub> CrN <sub>4</sub> O <sub>13</sub> |
| <i>M<sub>r</sub></i> /g mol <sup>-1</sup>     | 882.64                                                                         | 601.50                                                           |
| Crystal system                                | Monoclinic                                                                     | Monoclinic                                                       |
| Space group                                   | <i>P</i> 2 <sub>1</sub> / <i>c</i>                                             | <i>P</i> 2 <sub>1</sub> / <i>a</i>                               |
| <i>a</i> /Å                                   | 16.1963(12)                                                                    | 19.4728(7)                                                       |
| <i>b</i> /Å                                   | 16.75325(96)                                                                   | 12.6551(4)                                                       |
| <i>c</i> /Å                                   | 13.8097(10)                                                                    | 10.8221(4)                                                       |
| <i>α</i> /°                                   | 90                                                                             | 90                                                               |
| <i>β</i> /°                                   | 103.5740(46)                                                                   | 94.1606(3)                                                       |
| <i>γ</i> /°                                   | 90                                                                             | 90                                                               |
| <i>V</i> /Å <sup>3</sup>                      | 3642.45(44)                                                                    | 2659.89(17)                                                      |
| <i>Z</i>                                      | 4                                                                              | 4                                                                |
| <i>ρ</i> <sub>calcd</sub> /g cm <sup>-3</sup> | 1.610                                                                          | 1.502                                                            |
| Step size/°                                   | 0.013                                                                          | 0.013                                                            |
| 2 <i>θ</i> range/°                            | 5–70                                                                           | 6.4–50                                                           |
| <i>R<sub>p</sub></i>                          | 0.0311                                                                         | 0.0401                                                           |
| <i>R<sub>wp</sub></i>                         | 0.0402                                                                         | 0.048                                                            |
| <i>R<sub>exp</sub></i>                        | 0.0230                                                                         | 0.016                                                            |
| Refined parameters                            | 67                                                                             | 70                                                               |
| Background                                    | Chebyshev polynomial of 6 <sup>th</sup> order                                  |                                                                  |

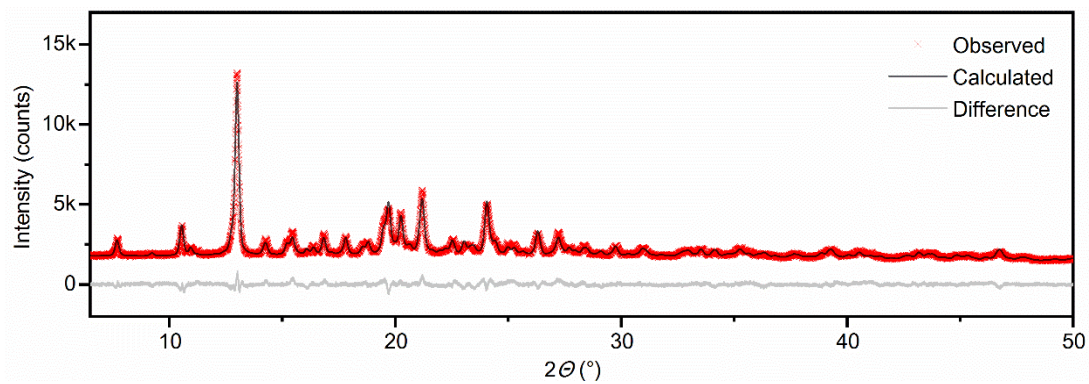

Figure S1. Room temperature XRPD pattern and profile fitting results for **1**

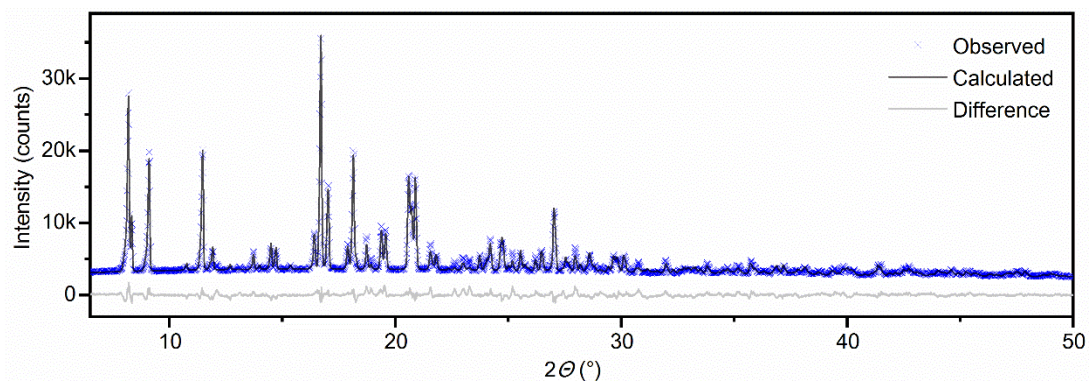

Figure S2. Room temperature XRPD pattern and profile fitting results for  $3H_2O$

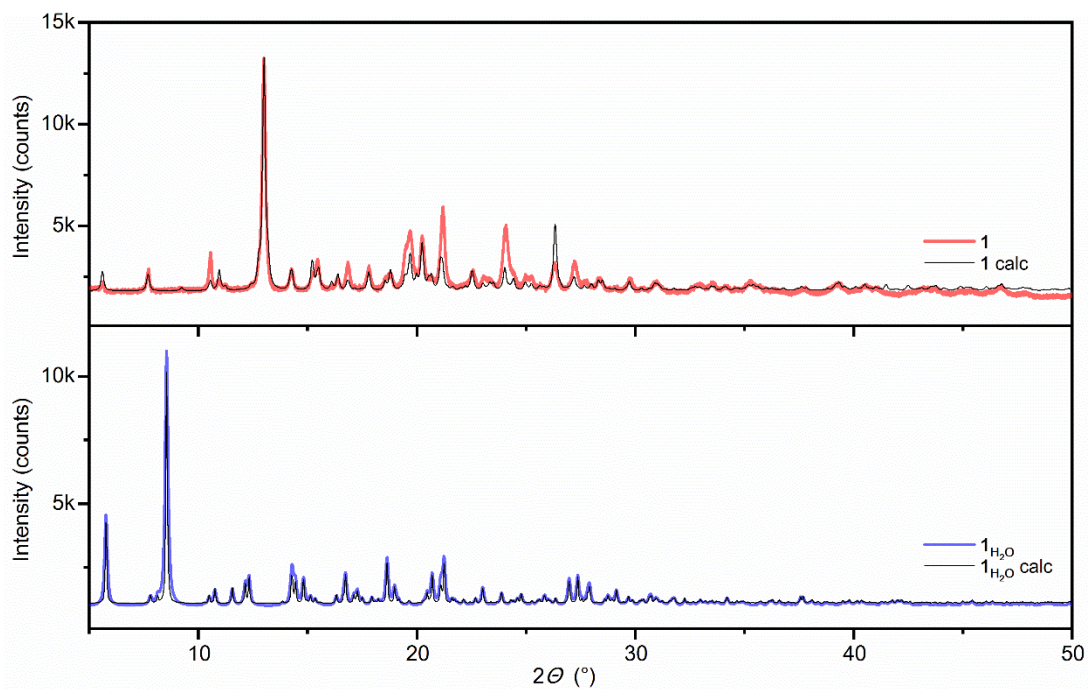

**Figure S3.** XRPD patterns of **1**, **1**<sub>H<sub>2</sub>O</sub> and corresponding calculated patterns from single-crystal X-ray diffraction data

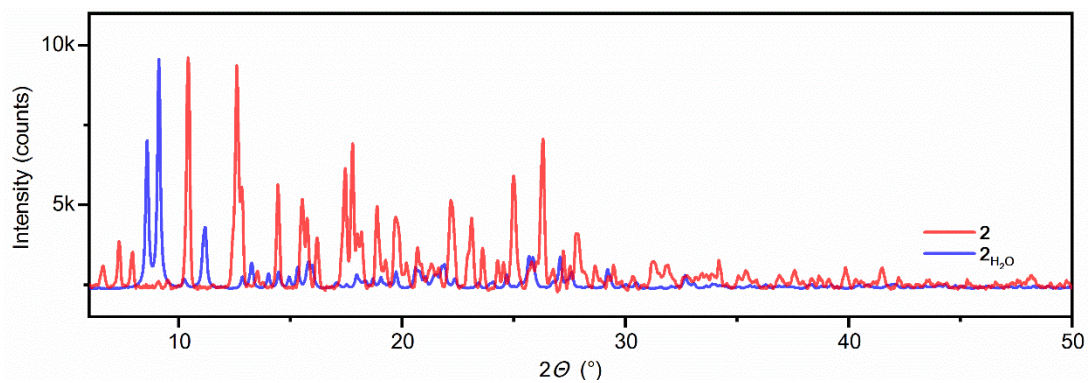

**Figure S4.** XRPD patterns of **2** and **2**<sub>H<sub>2</sub>O</sub>



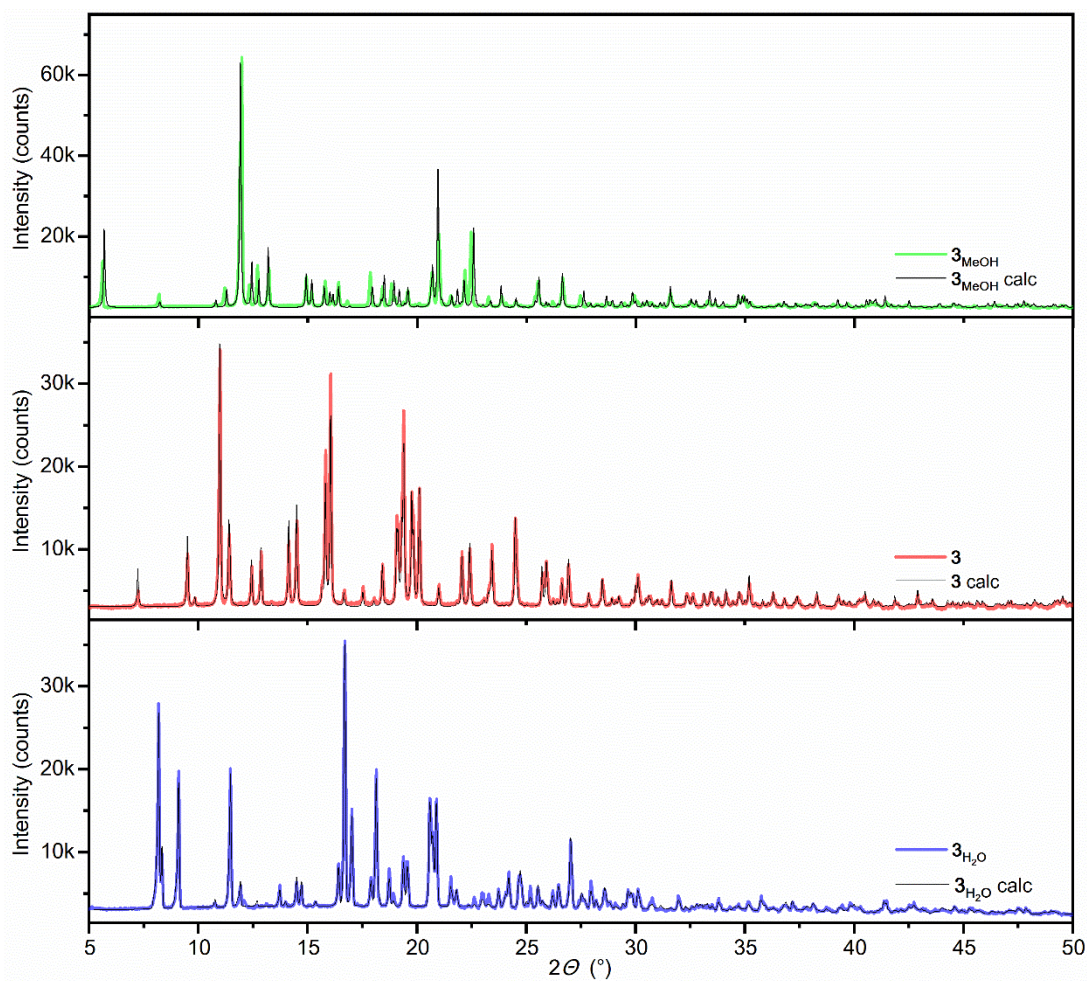

Figure S5. XRPD patterns of  $3$ ,  $3_{\text{H}_2\text{O}}$ ,  $3_{\text{MeOH}}$  and corresponding calculated patterns from single-crystal X-ray diffraction data

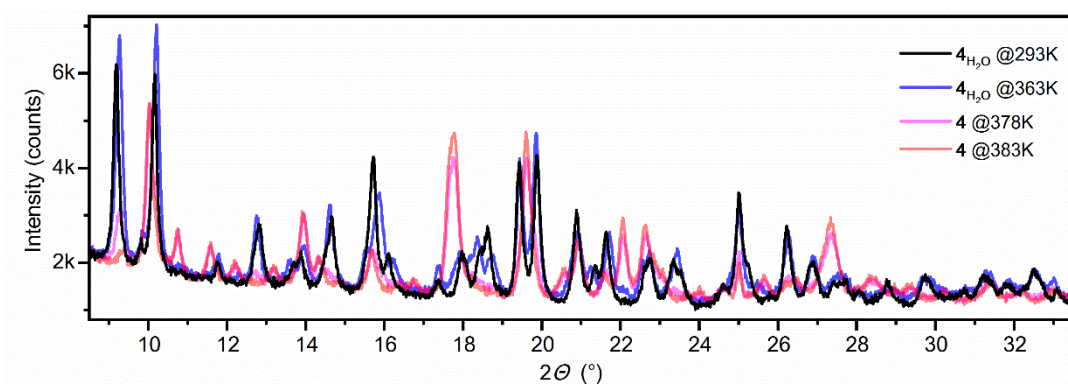

Figure S6. XRPD patterns of  $4_{\text{H}_2\text{O}}$  at 293 and 363 K, and  $4$  at 378 and 383 K

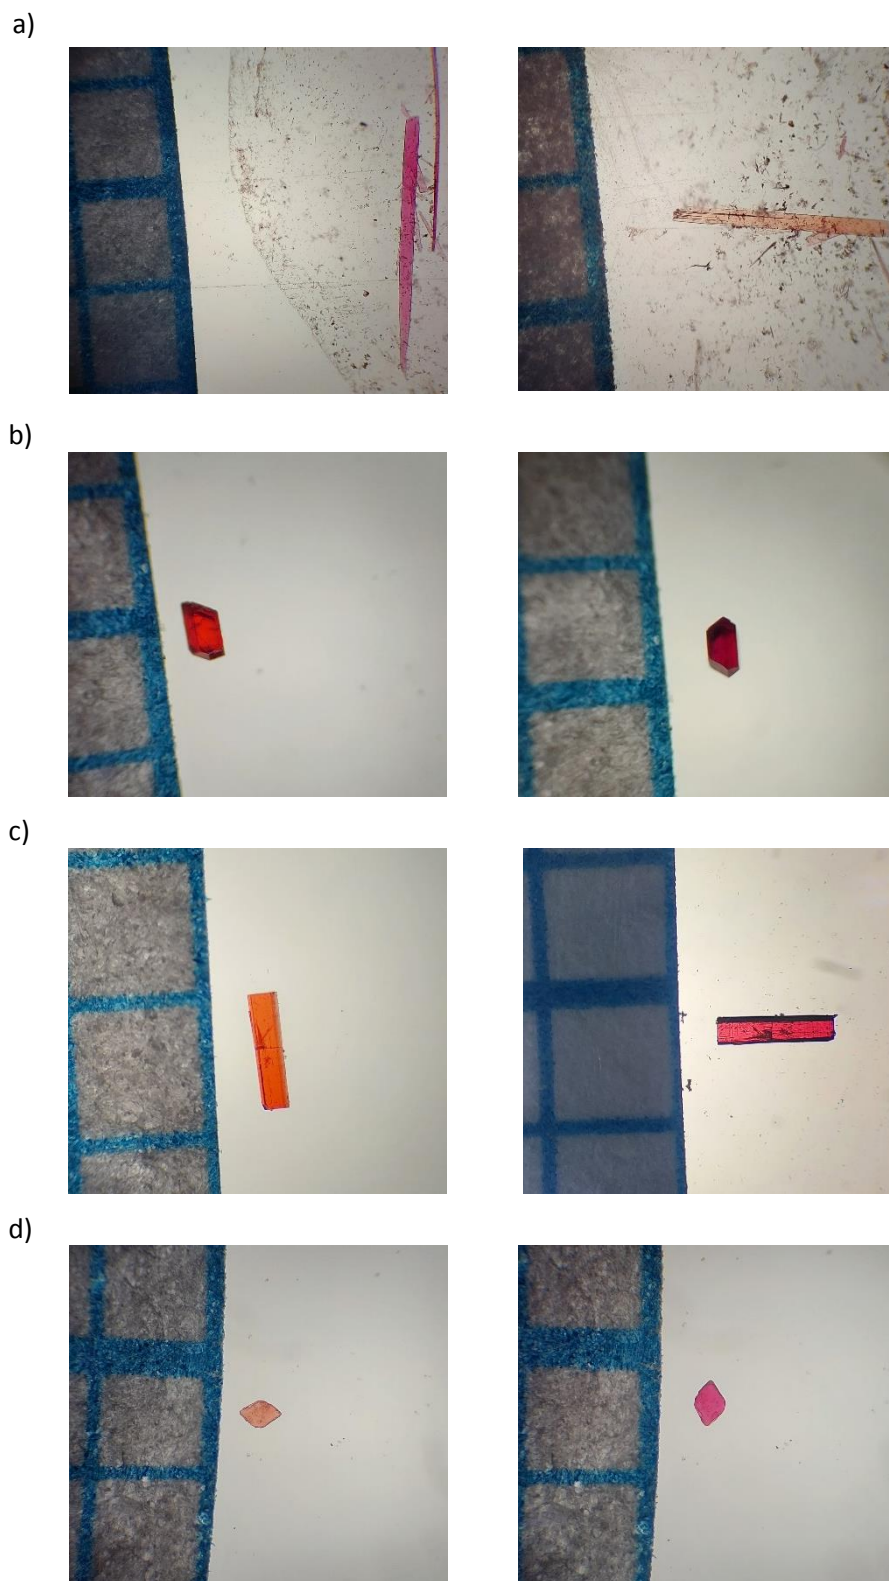

Figure S7. Pleochroism in complex salts  $1_{H_2O}$  (a),  $3_{MeOH}$  (b),  $5_{H_2O}$  (c) and  $6_{H_2O}$  (d)



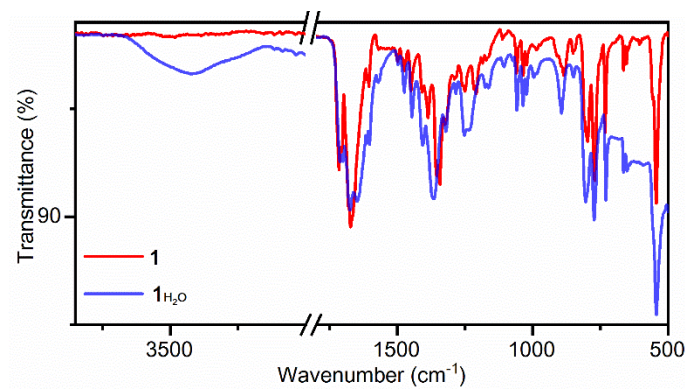

Figure S8. ATR spectra of 1 and 1<sub>H<sub>2</sub>O</sub>

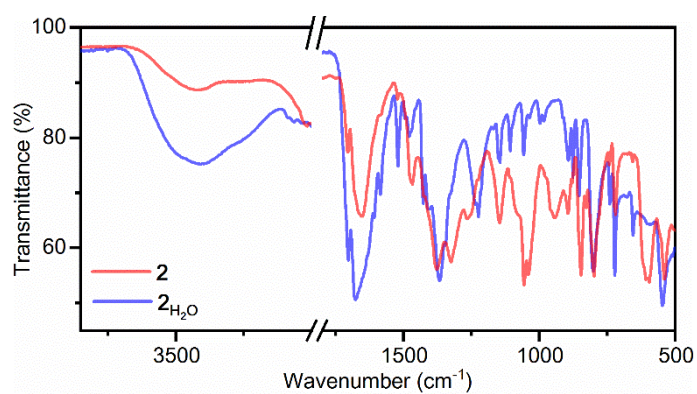

Figure S9. ATR spectra of 2 and 2<sub>H<sub>2</sub>O</sub>

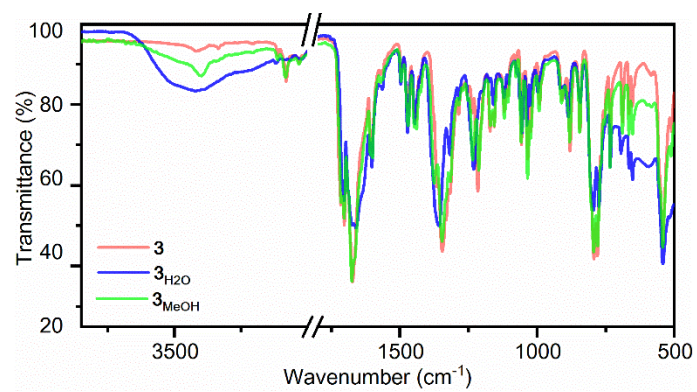

Figure S10. ATR spectra of 3, 3<sub>MeOH</sub> and 3<sub>H<sub>2</sub>O</sub>

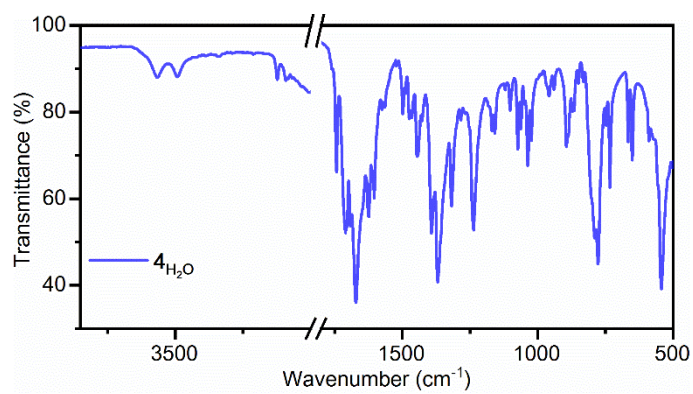

Figure S11. ATR spectrum of  $4\text{H}_2\text{O}$

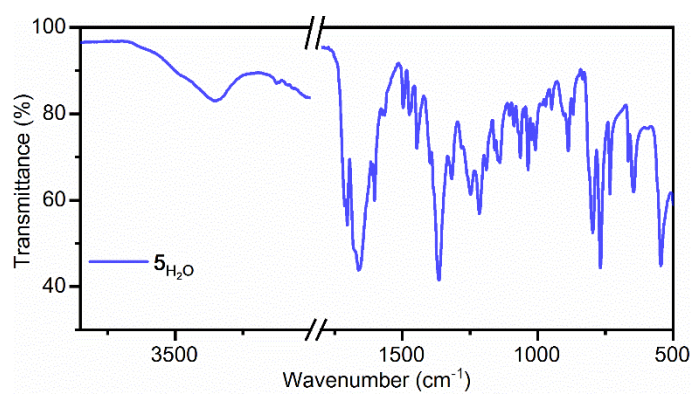

Figure S12. ATR spectrum of  $5\text{H}_2\text{O}$

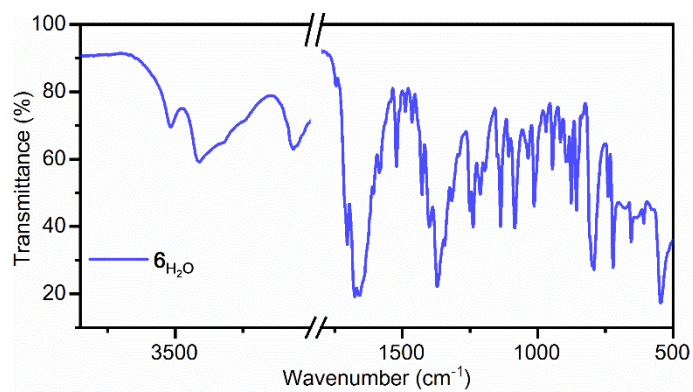

Figure S13. ATR spectrum of  $6\text{H}_2\text{O}$

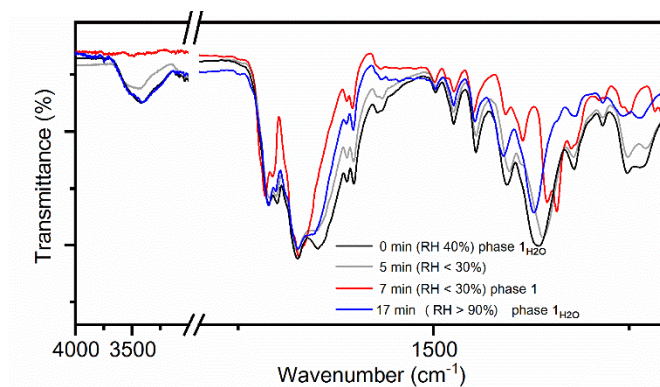

**Figure S14.** *In situ* ATR spectra following the drying and wetting proces of compound **1** at 298 K and atmosperic pressure

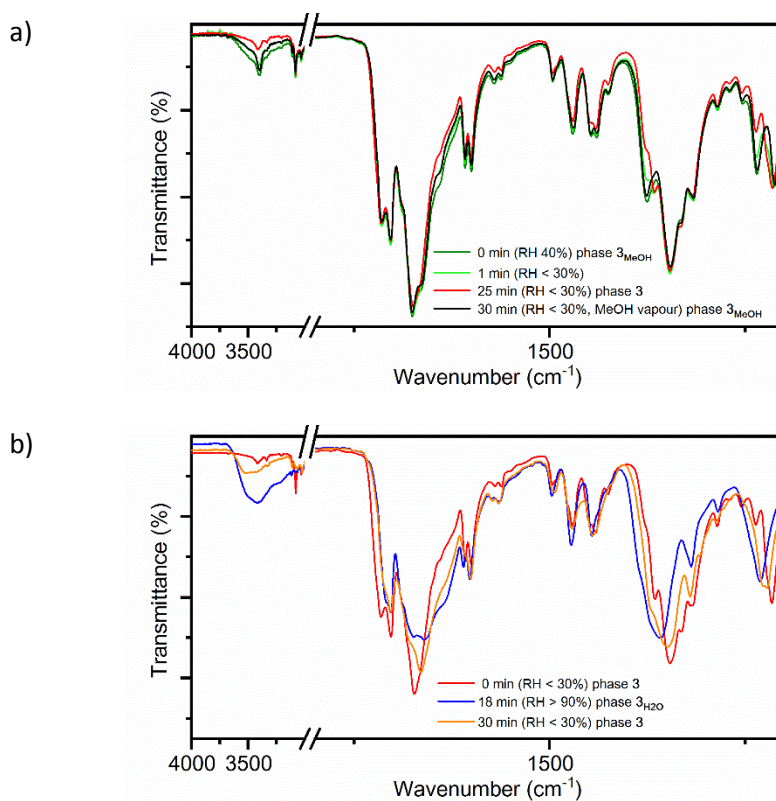

**Figure S15.** *In situ* ATR spectra following the drying and recovery (exposure to MeOH vapour) process of compound **3<sub>MeOH</sub>** at 25 °C and atmosperic pressure (a). *In situ* ATR spectra following the wetting and drying process of compound **3<sub>H<sub>2</sub>O</sub>** at at 298 K and atmosperic pressure (b)

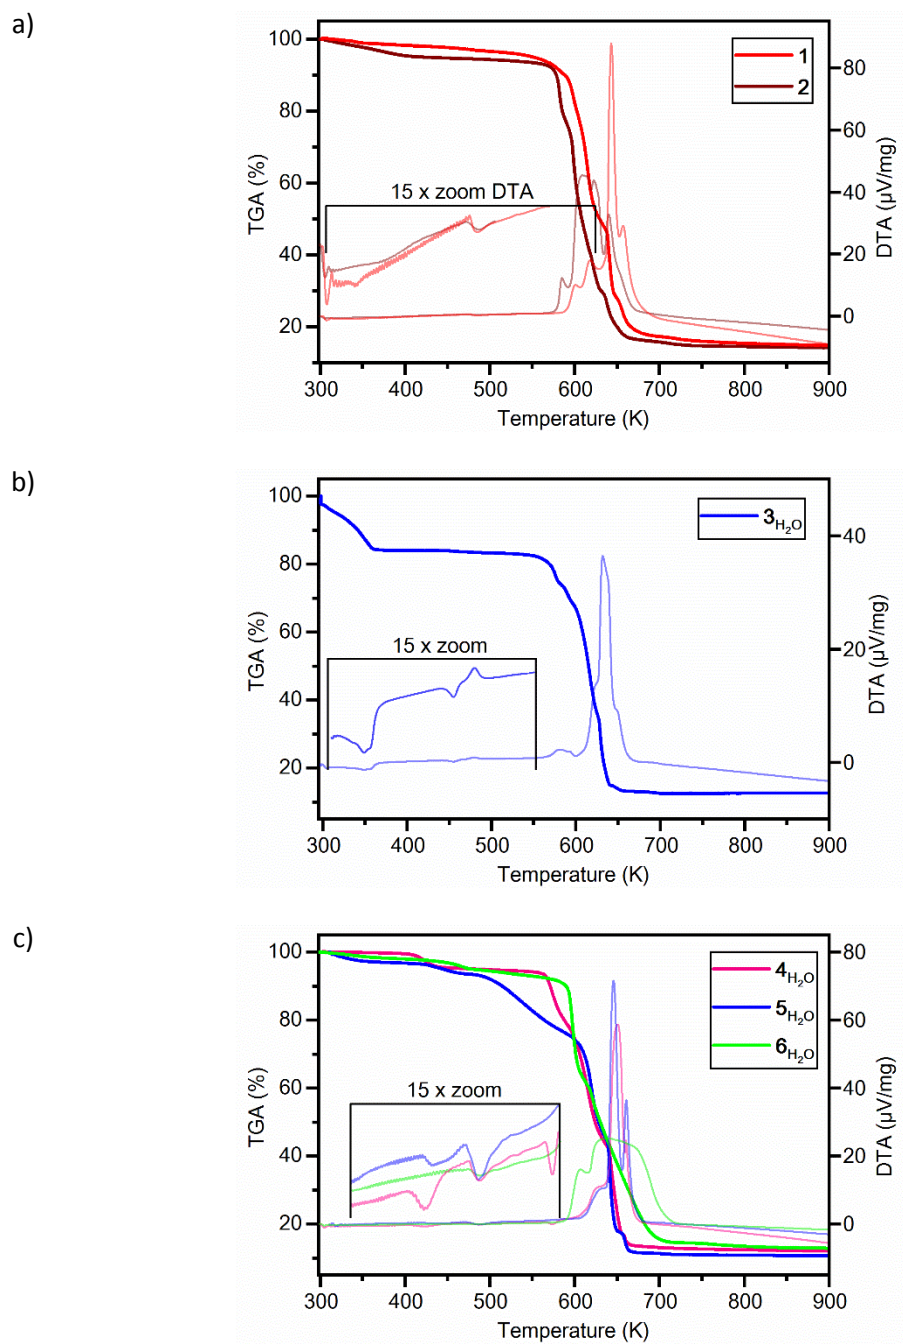

**Figure S16.** TGA and DTA curves for compounds: **1** and **2** (a), **3**<sub>H<sub>2</sub>O</sub> (b) and **4**<sub>H<sub>2</sub>O</sub>–**6**<sub>H<sub>2</sub>O</sub> (c) measured under a synthetic air atmosphere



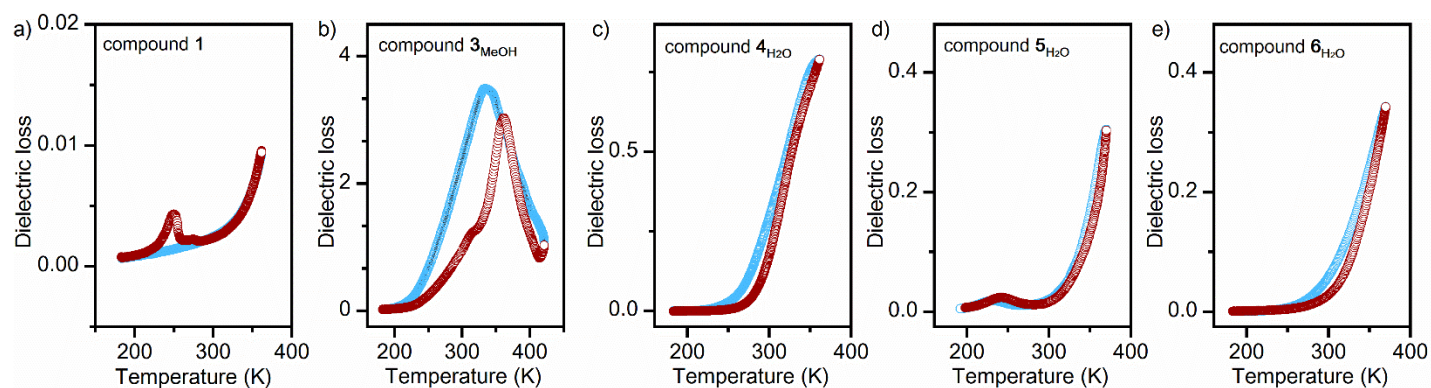

**Figure S17.** Temperature dependence of the dielectric loss during heating (dark red symbols) and cooling (blue symbols) cycles measured at 100 kHz frequency for compounds **1**, **3<sub>MeOH</sub>**, **4<sub>H<sub>2</sub>O</sub>**, **5<sub>H<sub>2</sub>O</sub>**, and **6<sub>H<sub>2</sub>O</sub>**

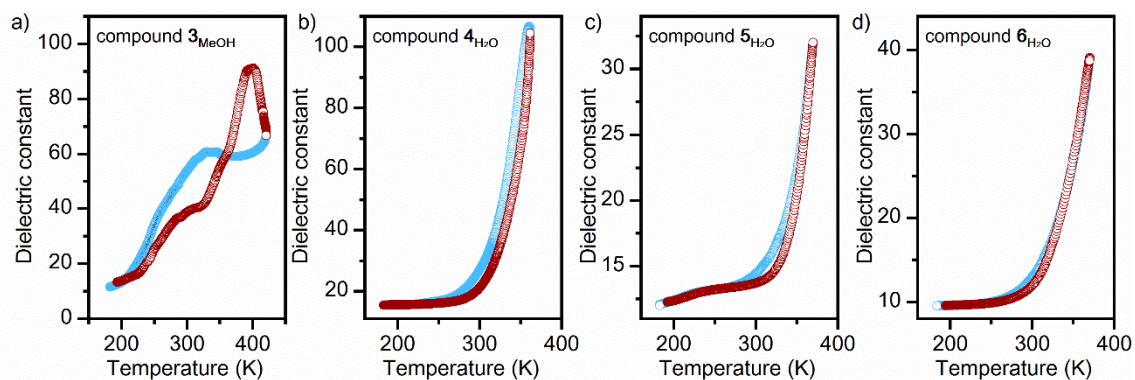

**Figure S18.** Temperature dependence of the dielectric constant during heating (dark red symbols) and cooling (blue symbols) cycles measured at 10 kHz frequency for compounds **3<sub>MeOH</sub>**, **4<sub>H<sub>2</sub>O</sub>**, **5<sub>H<sub>2</sub>O</sub>**, and **6<sub>H<sub>2</sub>O</sub>**



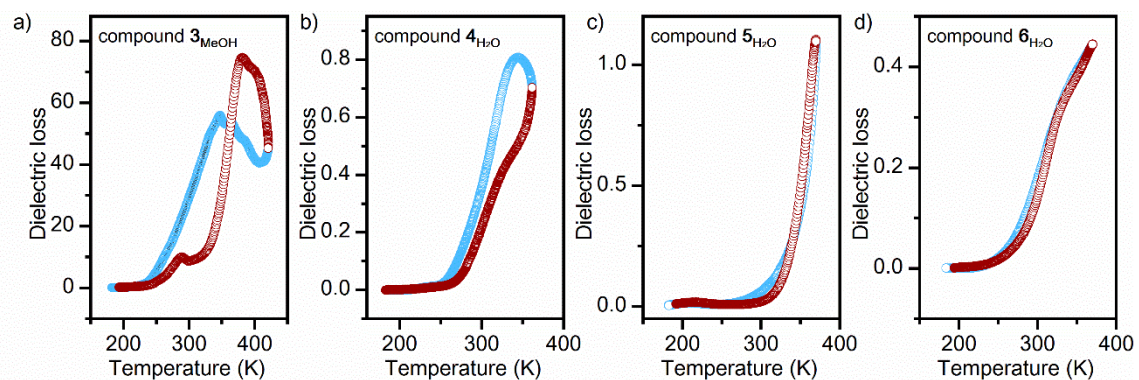

**Figure S19.** Temperature dependence of the dielectric loss during heating (dark red symbols) and cooling (blue symbols) cycles measured at 10 kHz frequency for compounds  $3_{\text{MeOH}}$ ,  $4_{\text{H}_2\text{O}}$ ,  $5_{\text{H}_2\text{O}}$ , and  $6_{\text{H}_2\text{O}}$

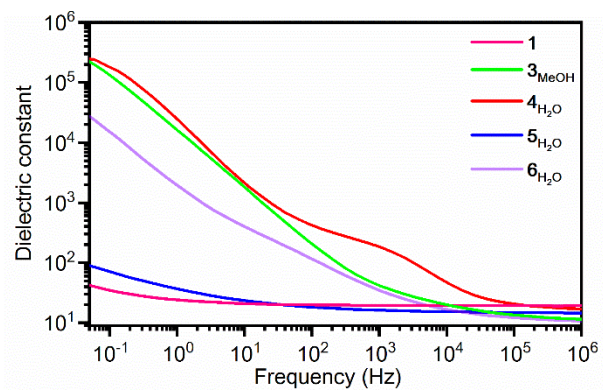

**Figure S20.** Frequency dependence of the dielectric constant for compounds  $1$ ,  $3_{\text{MeOH}}$ ,  $4_{\text{H}_2\text{O}}$ ,  $5_{\text{H}_2\text{O}}$ , and  $6_{\text{H}_2\text{O}}$  at 298 K
